# Supplementary material for: Proteomics research in forest trees: A 2012-2022 update
Source: Front Plant Sci. 2023 Apr 5;14:1130665. doi: 10.3389/fpls.2023.1130665 (PMC10114611; doi:10.3389/fpls.2023.1130665)
Supplement: Supplementary file 1 [file Table_1.xlsx]

## Sheet: Sheet1
Table S1. Proteomics papers reviewed in forest tree species (2012-2022)
Genus	Species	Objective	Reference	Plant organ	Proteomic strategy	Main results
Eucaliptus	Eucalyptus spp.	To investigate the molecular mechanisms of water deficit.	Bedon et al., 2012	Leaves and stems	2DE -LC-MS/MS (DDA)	Cell wall modification, ROS detoxification and osmoregulation mechanisms were releaved in drought-tolerant genotype when exposed to drought.
	E. globulus	To understand the mechanisms underlying adaptive responses to drought stress.	Valdés et al., 2013	Seeds	2DE -MALDI-TOF/TOF	Adaptation to drought occurs in multiple dimensions in drought-tolerant genotypes, including changes in LEA expression and endogenous ABA content.
	E. camaldulensis	To investigate the molecular mechanisms involved in plant responses to soil contamination with heavy metals in the presence of mycorrizal additives.	Guarino et al., 2014	Leaves	2DE -LC-MS/MS (DDA)	Eucalyptus hyperaccumulators presented and over-representation of antioxidant enzymes, chaperones, and proteins involved in glutathione metabolism when exposed to heavy metals -contaminated site. Glutathione molecule was suggested to be a key element on the formation of heavy metal chelating complexes.
	E. urophylla × E. tereticornis hibrid	To investigate the defense mechanism of resistant cultivars to Calonectria pseudoreteaudii.	Chen et al., 2015	Leaves	iTRAQ	Infection with Calonectria pseudoreteaudii activated the phenylpropanoid pathway, terpenoid biosynthesis and signalling pathways. The protein WRKY33 and PR isoforms were recruited during infection; while protein metabolism and photosynthesis were down-regulated during pathogen attack.
	E. urophylla	To investigate the stem proteome changes upon short-term cold stress.	Leonardi et al., 2015	Stems	2DE -LC-MS/MS (DDA)	Responses are mostly represented by down-regulation of specific proteins involved in energy metabolism, signaling, and protein synthesis.
	E. grandis	To investigate the molecular mechanisms that regulate bark metabolism in response to seasonal variation.	Budzinski et al., 2016a	Bark	2DE -LC-MS/MS (DDA)	Metabolic reconfiguration triggered by seasonal variation is shown and proteome data suggest that carbohydrate formation seems to be favored during winter.
	E. grandis	To investigate the seasonal alterations in the cambial zone.	Budzinski et al., 2016b	Bark-Cambial Zone	2DE -LC-MS/MS (DDA)	Reconfiguration of carbon and primary metabolism in cambial zones as a response to seasons is revealed.
	E. urophylla	To identify changes in the Calvin-Benson cycle in response to a high carbon dioxide atmosphere.	Santos & Balbuena, 2017	Leaves-Chloroplast	LC-MS/MS (DDA)	Most proteins involved in carbon assimilation were up-regulated when plants were cultivated at high carbon dioxide levels.
	E. grandis and E. globulus	To identify changes in the lignin biosynthesis subproteome in response to temperature variations.	Costa et al., 2017	Stems	LC-MS/MS (DDA)	Antioxidant and lignin biosynthesis metabolisms were perturbed when plants were exposed to different temperatures.
	E. grandis	To characterize the role of protein arginine methyltransferases in a long-living organism.	Plett et al., 2017	Roots	LC-MS/MS (DDA)	Protein arginine methyltransferase (PRMT) isinvolved in key events during developmental processes. The protein PRMT1 is involved in root hair initiation/elongation and the methylation of β-tubulin.
	E. grandis	To investigate the effect and defense responses to Chrysoporthe austroafricana.	Zwart et al., 2017	Stems	iTRAQ	A central role for SA signalling for defence against Chrysoporthe austroafricana was revealed. Additionally, other processes typically associated with SA-mediated processes, including cell death, R protein induction and systemic resistance were shown to be stimulated upon C. austroafricana inoculation.
	Eucalyptus spp.	To investigate if species with restricted and large range sizes differ in heatwave tolerance and if trees grown under warmer temperatures are more tolerant to heatwaves.	Aspinwall et al., 2019	Leaves	LC-MS/MS (DDA)	Warmer-grown plants and trees with restricted range size were more susceptible to heatwaves.
	E. saligna and E. tereticornis	To identify the contrasting responses between species under water stress.	Martins et al., 2020	Leaves	2DE -LC-MS/MS (DDA)	The proteins ATP synthase gamma and alpha, glutamine synthetase and a vacuolar protein were shown to be more abundant in drought-tolerant species and, simultaneously, less abundant or unchanged in the drought- sensitive species, suggesting the use of those identifications as molecular markers for water stress.
	E. grandis, E. dunnii and E. benthamii	To investigate the proteome changes induced by cold acclimation.	Oberschelp et al., 2020	Leaves	LC-MS/MS (DDA)	Acclimation in a high frost tolerant Eucalyptus species (Eucalyptus benthamii) involved accumulation of different sugars, as well as secondary metabolism and ROS detoxification enzymes.
	E. grandis and E. globulus	To identify markers involved in low and high-temperature adaptation.	Costa et al., 2020	Stems	LC-MS/MS (DDA)	Conversely to Eucalyptus grandis, Eucalyptus globulus plants showed a unique proteome signature towards adapting to low-temperature conditions.
	E. grandis	To identify novel protein-coding sequences.	Jorge & Balbuena, 2021	Leaves	LC-MS/MS (DDA)	A proteogenomics pipleine was used to identify novel peptide forms in E. grandis leaves. Most novel peptides were originated from alternative frame readings. Single-aminoacid substitued forms were validated through parallel-reaction-monitoring experiments.
	E. grandis	To investigate Austropuccinia psidii resistance and susceptibility mechanisms.	Sekiya et al., 2021	Leaves	LC-MS/MS (DDA)	Modulation of oxidative effects are crucial for enhancement of immune activation against Austropuccinia psidii.
	E. urophylla × E. grandis hibrid	To elucidate the molecular mechanisms underlying nitrogen transfer in intercropping and monocropping systems.	Yao et al., 2021	Roots	TMT/iTRAQ	Intercropping resulted in the up-regulation of biosynthetic proteins, particularly those involved in the nitrogen metabolism. The glutamine synthetase nodule isozyme was highlighted as an important up-regulated protein in Eucalyptus seedlings grown in interopping systems.
	E. grandis	To investigate seasonal changes and leaf aging effect in the chloroplast proteome.	Baldassi et al., 2022	Leaves-Chloroplast	LC-MS/MS (DDA)	Chloroplast proteome analysis during leaf maturation revealed that most upregulated proteins identified in mature and young leaves were those related to catabolic-redox signaling and biogenesis processes, respectively. Seasonal analysis revealed that the most abundant chloroplast protein in spring and summer was a small subunit of RuBisCO, while in fall and winter the proteins that showed the mos…
Pinus	P. massoniana	To study acid rain stress response in a susceptible (P. massoniana) and a resistant species (Taxus wallichianavar.mairei)	He at al., 2014a	Seedling needles	2DE MALDI-TOF/TOF	A proteomics-based model of the systemic changes taking place in response to acid rain in a susceptible (P. massoniana) and a resistant (Taxus wallichiana var. mairei) species. The abundance of proteins related to photosynthesis, metabolism, hormones, cell structure, stress, defence, signalling and transcription regulation were suggested to be responsible for differential susceptibility to acid r…
	P. massoniana	To study the role of calcium in the stress response induced by acid rain	He et al., 2014b	Seedling needles	2DE MALDI-TOF/TOF	Calcium levels impact the abundance of proteins related to defense, Calvin and TCA cycles, glycolysis, and nitrogen metabolism, suggesting calcium might be an important tolerance determinant.
	P. radiata	To analyze the changes at the nuclear proteome level in response to UV stress	Pascual et al., 2016	Seedling needles	LC-MS/MS (DDA)	More than 30 transcription factors from different families were correlated to UV stress response mechanisms.
	P. radiata	To study the response to UV stress	Pascual et al., 2017	Seedling needles	LC-MS/MS (DDA)	Metabolism is rearranged to deal with oxidative stress. New protein kinases and proteases are associated withsignaling and regulatory processes during the UV stress response.
	P. radiata	To study the different phases of the heat stress response	Escandón et al., 2017	Seedling needles	LC-MS/MS (DDA)	Proteins related to hormone signaling and lipid and flavonoid metabolism are important for short-term heat stress response. PHOSPHATASE TRANSPORTER 1 and the transcription factor APFI were identified as potential stress resistance biomarkers.
	P. radiata	To study the changes in the nuclear proteome in response to heat stress and relation to heat stress memory	Lamelas et al., 2020	Seedling needles	LC-MS/MS (DDA)	Epigenetic and post-transcriptional regulation mediate heat stress response and memory. Changes in the abundance of small Heat Shock Proteins (sHSPs) were observed in response to heat stress. Activated methyl cycle enzymes, related to plant trans-methylation capacity, histone variants, particularly H2A, arginine/serine rich splicing factors (SRSF) and ribosomal proteins were associated to stress …
	P. sylvestris	To study the variability in the adaptation capacity to cold stress in different Scots pine populations	Baniulis et al., 2020	Seedling needles	2DE MALDI-TOF/TOF	Differences in adaptation capacity to cold stress were associated with different levels of accumulation of Ser/Thr-protein phosphatases, regarded as stress response negative regulators.
	P. radiata	To study the effect of applying heat stress during somatic embriogenesis initiation over the different stages of the process	Castander-Olarieta et al., 2021	Somatic embryos	LC-MS/MS (DDA and DIA/SWATH-MS)	Heat stress led to the accumulation of heat shock proteins, transport proteins related to fatty acids synthesis, and proteins involved in post-transcriptional regulation, while it decreased the abundance of proteins related to glycolysis, nitrogen assimilation, and oxidative stress.
	P. radiata and P. pinea	To analyze the Pinus-Fusarium circinatum interaction	Amaral et al., 2021	Seedling needles	LC-MS/MS (DDA)	A pathogen-mediated decrease of secondary metabolism and chloroplast redox balance proteins were associated with susceptibility to the pathogen, while an accumulation of membrane-trafficking proteins was correlated to resistance. The cross-talk between abscisic acid and epigenetic regulation was revealed as an important mechanism in response to the pathogen.
	P. radiata	To study organellar cross-talk during the heat stress response	Lamelas et al., 2022	Seedling needles	LC-MS/MS (DDA)	Chloroplast-nucleus communication and the rearrangement of RNA metabolism mediated by microRNAs were uncovered as new layers of regulation in heat stress response.
	P. radiata	To analyze the protein and soluble sugars profile of embryonal masses after heat stress to unravel the mechanisms involved in priming and stress memory	Castander-Olarieta et al., 2022	Embryonal masses	LC-MS/MS (DDA and DIA/SWATH-MS)	Heat stress provoked changes in the protein life cycle, reduced metabolisms, and promoted the accumulation of proteins related to oxidative stress, epigenetic, transcriptional, and post-transcriptional regulation.
	P. radiata	To investigate transgenerational stress cross-tolerance and priming	García-Campa et al., 2022	Seedling needles	LC-MS/MS (DDA)	Parental growing conditions have transgenerational cross-stress priming effects driven by proteins related to photorespiration, redox balance, and secondary metabolism.
	P. massoniana	To study Pinus-Bursaphelenchus xylophilusinteraction	Gao et al., 2022	Phloem	LC-MS/MS (TMT and PRM)	The abundance of proteins related to salicylic acid metabolism, the antioxidant system, polysaccharides degradation, and lipid metabolism changed in response to the nematode infestation.
	P. pinaster and P. pinea	To compare the proteome of Bursaphelenchus xylophilussecretome following stimulation with extracts from different pine hosts	Silva et al., 2022	Nematode secretome	LC-MS/MS (DIA/SWATH-MS)	Peptidases, hydrolases, and antioxidant proteins were associated with pathogenicity
Quercus	Q. ilex L.	To analyze the response to drought stress in two Andalusia (southern Spain) Q. ilex provenances	Valero-Galván et al., 2013	Leaves of seedlings	2DE MALDI-TOF/TOF	A general reduction in protein abundance, especially in those related to ATP synthesis and photosynthesis, was observed upon water withholding for both provenances, being more pronounced in the less tolerant.
	Q. ilex L.	To study the response of Q. ilex to Phytophthora cinnamomi	Sghaier-Hammami et al., 2013	Leaves of seedlings	2DE MALDI-TOF/TOF	Proteins related to starch biosynthesis, glycolysis, and stress-related peroxiredoxin showed an increase upon P. cinnamomi inoculation.
	Q. ilex L.	To analyze the response of Q. ilex seedlings root to drought stress	Simova-Stoilova et al., 2015	Root of seedlings	2DE MALDI-TOF/TOF	Enzymes of carbohydrate metabolism decreased in roots under drought stress while some related to ATP synthesis and secondary metabolism increased. A metabolic adjustment and mobilization of the defense system in roots to actively counteract drought stress is occurring.
	Q. ilex L.	To prove state-of-the-art instrumentation and similar workflows to those employed in model species to reconstruct different metabolic pathways in Q. ilex.	López-Hidalgo et al., 2018	A pool of homogenized tissue from acorn embryo, leaves, and roots	LC-MS/MS (DDA) combined transcriptomic (NGS-Illumina) and metabolomic (GC-MS) approaches	The integration of multi-omic (transcriptomics, proteomics and metabolomics) data allowed the partial reconstruction of the metabolism of holm oak: 123 metabolic pathways were visualized, including carbohydrate and energy metabolism, amino acid, lipid, and nucleotide metabolism, and biosynthesis of secondary metabolites. The TCA cycle was the most represented pathway in the three levels of regula…
	Q. ilex L.	To study the response of different parts of Q. ilex seedlings to water limitation	Simova-Stoilova et al., 2018	Root tips and part of cotyledon of seedlings	2DE MALDI-TOF/TOF	An increase in starch metabolism, lipid-to-sugar conversion, reserve proteins, and mobilization proteins increased in cotyledons. In roots, increased proteins were related to sugar utilization, secondary metabolisms, and defense (PR-5 and PR-10). Results emphasize the importance of sink-source interaction between root and cotyledon in the time course of stress and recovery.
	Q. ilex L.	To characterize the proteome profile on germination and early growth of Q. ilex embryo and seedlings	Romero-Rodriguez et al., 2019	Embryonic axis of mature and germinated seeds and shoots of seedlings	Gel-based (1D and 2D) and gel-free (LC-MS/MS DDA)	Complementary gel-based and gel-free proteomic strategies disclosed important metabolic changes occurring during germination and early seedling growth. The accumulation of proteases and amino acids metabolism proteins in mature seeds can reflect the production of energy from the mobilization of storage proteins to start germination. Proteins related to energy metabolism were accumulated during se…
	Q. ilex L.	To identify allergens in Q. ilex pollen	Pedrosa et al., 2020	Pollen	MALDI-TOF/TOF and LC-MS/MS (DDA)	The first allergen from Q. ilex pollen (Que i 1), a PR10 protein, was identified using a proteomic approach. A clinical study was carried out in which sera from allergic patients recognized Que i 1 in a high percentage (65.4%).
	Q. ilex L.	Application and optimization of label-free shotgun approach in the study of Q. ilex	Escandón et al., 2021	Root, leaf and seed	LC-MS/MS (DDA)	SEQUEST and proteotypic peptides analyses provided similar results using a mix of Q. ilex tissues, with a linear dynamic range of 100 to 600 ng for proteins and peptide identification and quantification, being optimal at 600 ng.
	Q. ilex L.	To identify putative markers of tolerance to drought in Q. ilex	San-Eufrasio et al., 2021a	Leaves of seedlings	Targeted post-acquisition LC-MS/MS (DDA)	A double proteomic strategy was used, involving the quantification of proteins and target peptides using a shotgun analysis and post-acquisition data analysis based on proteotypic peptides. For that, four Andalusian Q. ilex populations were studied, and a panel of putative markers of tolerance to drought was proposed among which the pretease subtilisin and the chaperone GrpE were considered the m…
	Q. ilex L.	To analyze the response of Q. ilex to the combined stress of Phytophthora cinnamomi and drought	San-Eufrasio et al., 2021b	Leaves of seedlings	LC-MS/MS (DDA)	A shotgun proteomic analysis of two contrasting Andalusian Q. ilex populations allowed to identify proteins up-accumulated in response to the combined stresses of drought and P. cinnamomi. The proteins aldehyde dehydrogenase, glucose-6-phosphate isomerase, 50S ribosomal protein L5, and a-1,4-glucan-protein synthase [UDP-forming] were proposed as putative markers for resilience in Q. ilex.
	Q. ilex L.	To identify proteases and protease inhibitors in Q. ilex seeds	Escandón et al., 2022	Embryonic axis and cotyledon of mature and germinated seeds	LC-MS/MS (DDA) combined Gel activity	A combined strategy of shotgun proteomics and protease activity was carried out on cotyledons and embryo axis tissues of non-viable, mature, and germinated seeds. This analysis allowed the identification of tissue-specific (cysteine protease inhibitors) and stage-specific proteases (cathepsin H cysteine protease, Clp proteases, subunits of the CNS and 26S proteasome), which can be related to seed…
	Q. suber and Q. variabilis	To analyze the response of Q. suber and Q. variabilis to Phytophthora cinnamomi	Saiz-Fernández et al., 2022	Leaves and roots of clonal seedlings	LC-MS/MS (DDA)	Q. variabilis displayed a greater upregulation of stress-related proteins in the leaves compared to Q. suber, namely peroxidases, superoxide dismutases, and glutathione S-transferases, together with proteins related to jasmonic acid metabolism. These differences could be responsible for the higher susceptibility of Q. suber to P. cinnamomi attack.
	Q. suber	To decipher the complex program underlying the development of Q. suber somatic embryos from the first early stage until maturity	Gomez-Garay et al., 2013	Somatic embryos	DIGE and MALDI-TOF/TOF	The proliferation stage is characterized by fermentation as an alternative energy source at the first steps of somatic embryo development, as well as by up-regulation of proteins involved in cell division, in which proteins like CAD and PR5 seem to be implied in embryonic competence. In the transition to the cotyledonary stage diverse ROS detoxification enzymes are activated and reserve products …
